# Supplementary material for: Genome-wide mapping of cancer dependency genes and genetic modifiers of chemotherapy in high-risk hepatoblastoma
Source: PubMed Central journal article supplement (PMC10326052; doi:10.1038/s41467-023-39717-6), 2023-07-06
Supplement: 41467_2023_39717_MOESM3_ESM.pdf [file 41467_2023_39717_MOESM3_ESM.pdf]

## Description of Additional Supplementary Files

File Name: Supplementary Data 1

Description: Bulk RNA-seq for ABC-Myc liver cancer model.

File Name: Supplementary Data 2

Description: Single cell cluster summary stats.

File Name: Supplementary Data 3

Description: Cluster 7 against other tumor clusters.

File Name: Supplementary Data 4

Description: Cluster 16 against other tumor clusters.

File Name: Supplementary Data 5

Description: Murine HB NEJF10 CRISPR screen.

File Name: Supplementary Data 6

Description: Targets with inhibitors available.

File Name: Supplementary Data 7

Description: Murine HB NEJF1 CRISPR screen.

File Name: Supplementary Data 8

Description: Murine HB NEJF6 CRISPR screen.

File Name: Supplementary Data 9

Description: Venn for NEJF1, NEJF6, NEJF10 CRISPR screen.

File Name: Supplementary Data 10

Description: DepMap Huh6.

File Name: Supplementary Data 11

Description: Venn for essential genes in Huh6 and NEJF1, NEJF6, NEJF10.

File Name: Supplementary Data 12

Description: IC20 doxorubicin CRISPR screen in NEJF10.

File Name: Supplementary Data 13

Description: IC90 doxorubicin CRISPR screen in NEJF10.
